# Supplementary material
Source: PubMed Central journal article supplement (PMC4081321)
Supplement: supp_pp.114.237958_237958supp.pdf [file supp_pp.114.237958_237958supp.pdf]

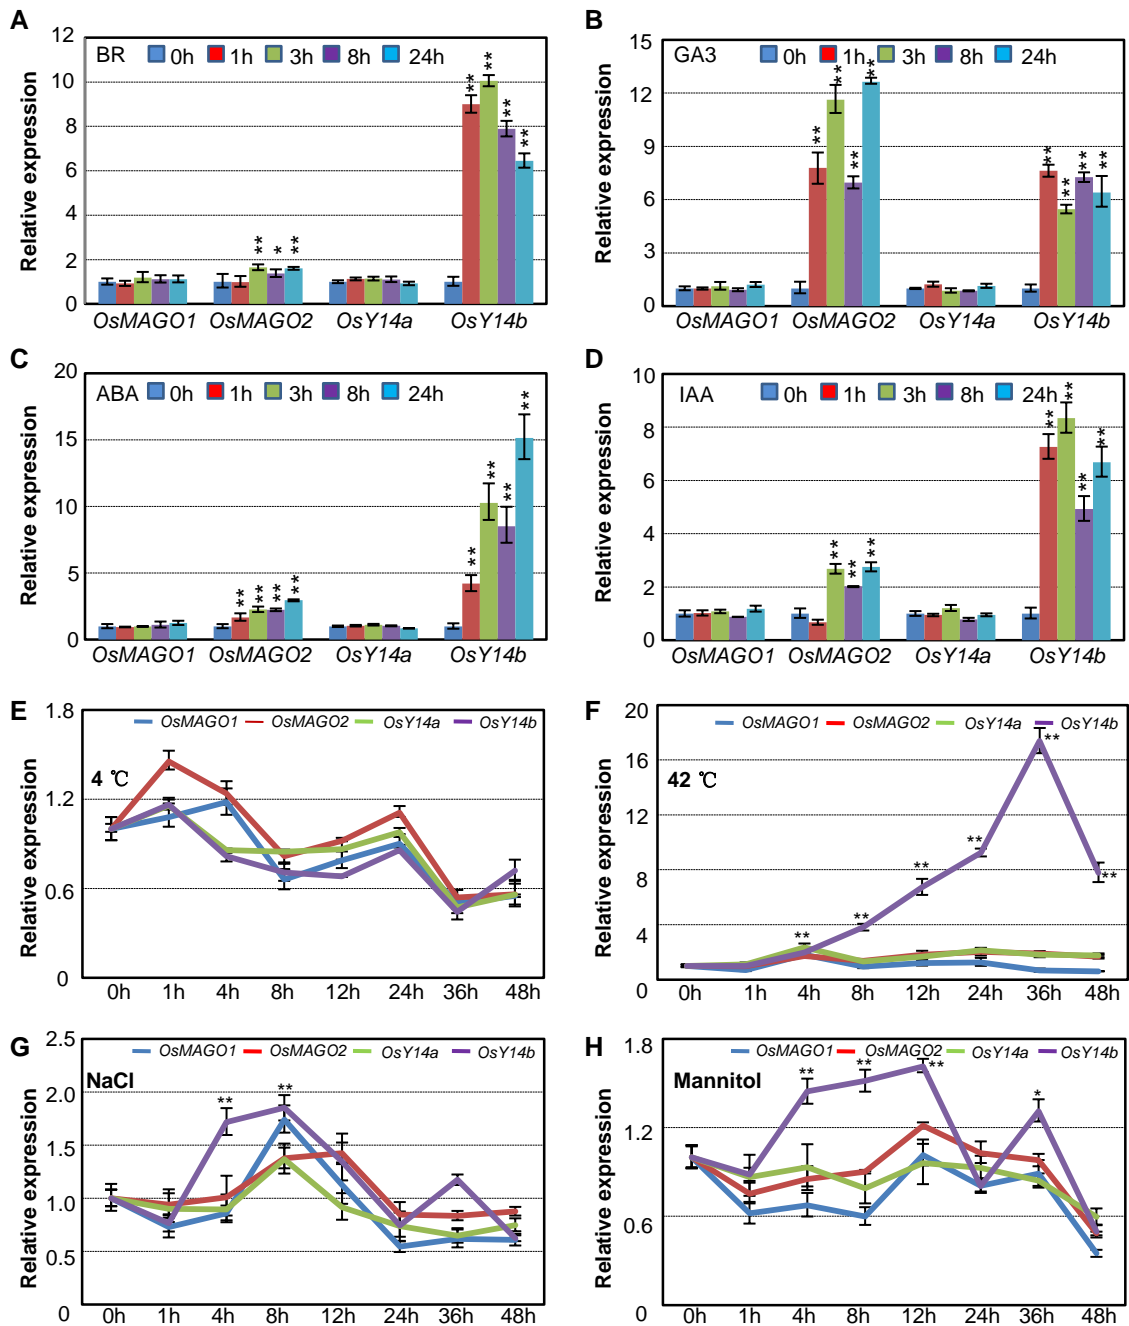

**Figure S1.** Gene Expressions of Rice *MAGO* and *Y14* under Different Types of Stresses.

(A-D) Gene expression in response to hormonal treatments. BR, brassinolide; GA3, gibberellic acid; ABA, abscisic acid; and IAA, indole acetic acid. (E-H) Gene expression in response to abiotic stresses indicated. *OsACTIN1* was used as an internal control. Expression data were expressed as results of three independent biological samples were. The expression for each gene without treatment was set to 1. The average expression and the standard deviation are presented. A two-tailed *t*-test was used to determine the significance of means. \* indicates  $P < 0.05$  and \*\* indicate  $P < 0.01$ .

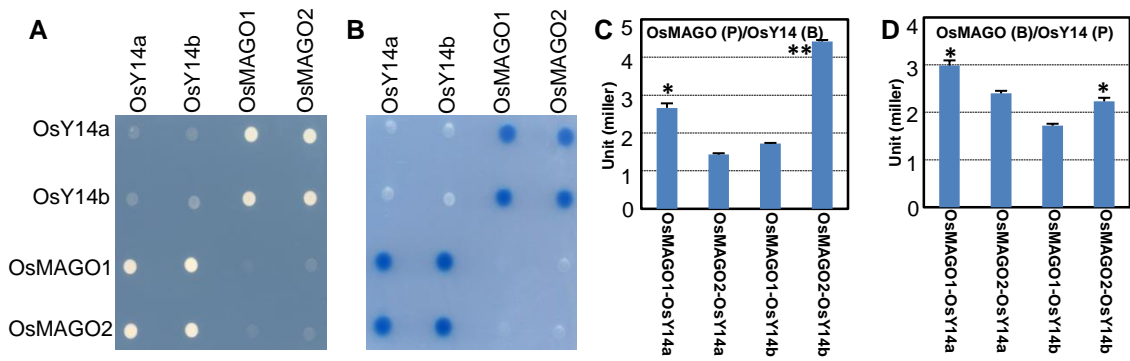

**Figure S2.** Interaction of Rice MAGO and Y14 Proteins in Yeast.

(A) Yeast cell growth on a high-stringency selective plate (SD/-Trp-His-Leu-Ade). (B) Non-lethal  $\beta$ -galactosidase assay. The expressed prey proteins (AD) are indicated above and the bait proteins (BD) to the left of the panels. (C and D) The interaction strength of OsMAGO1/2 and OsY14a/b using ONPG as substrate. P: prey; B: bait. The experiments were repeated three times. The average enzyme activity and the standard deviation are presented. The significance was evaluated by two-tailed *t*-test. \* indicates  $P < 0.05$ , and \*\* indicate  $P < 0.01$ .

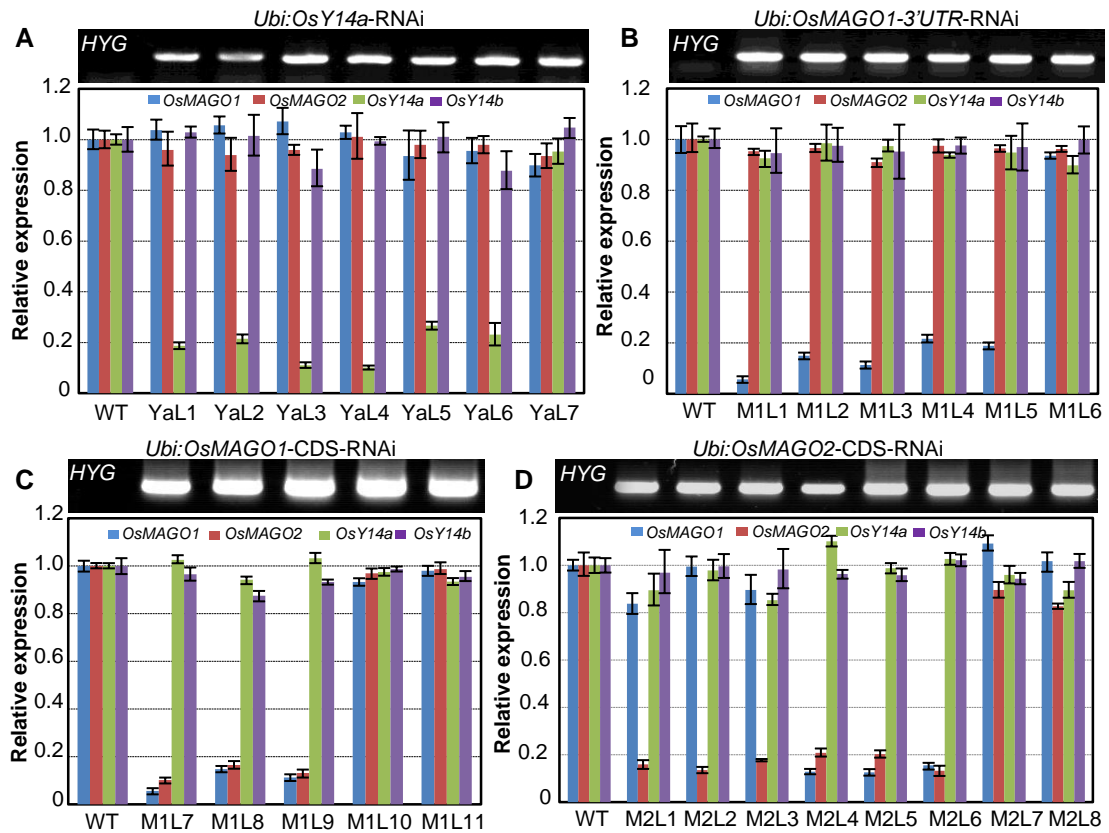

**Figure S3.** Genotyping Analyses of the RNAi Transgenic Rice Plants.

(A) *Ubi:OsY14a-RNAi*. (B) *Ubi:OsMAGO1-3'UTR-RNAi*. (C) *Ubi:OsMAGO1-CDS-RNAi*. (D)

*Ubi:OsMAGO2-CDS-RNAi*. *OsACTIN1* was used as an internal control. The expressions were detected with three independent biological samples. The expression for each gene in wild-type was set to 1. The average expression and the standard deviation are presented. Hygromycin resistant gene (*HYG*) expression was determined by RT-PCR.

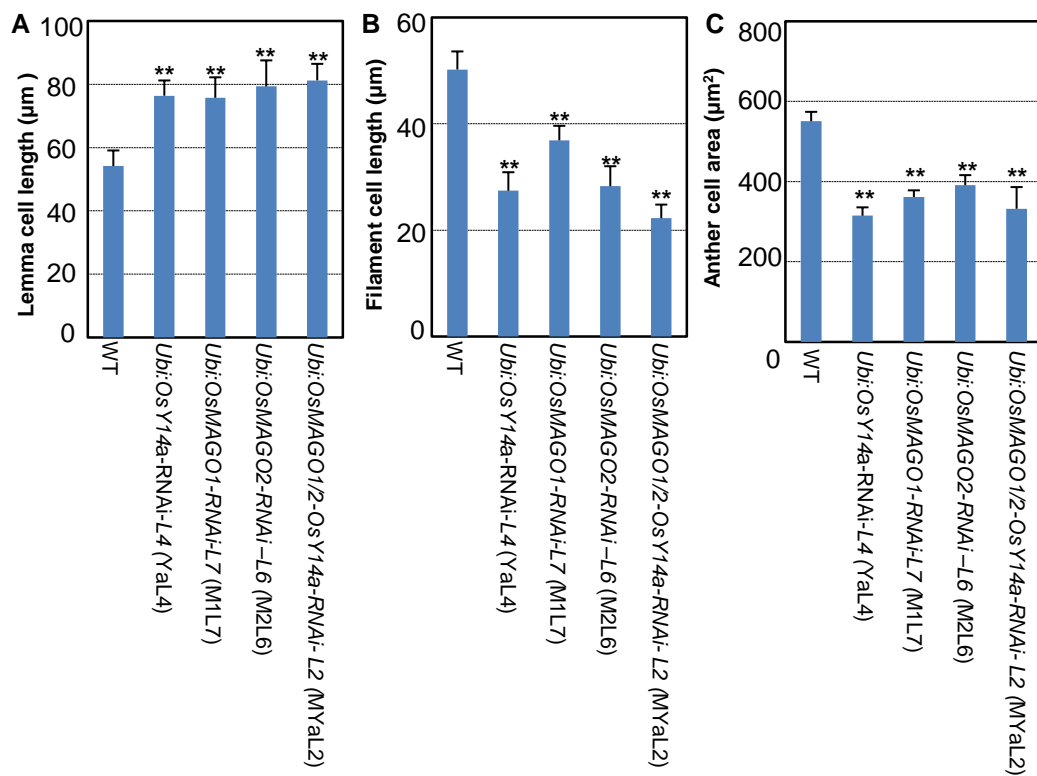

**Figure S4.** Variation in Cell Size in the Wild Type and Transgenic Rice Plants.

(A) Cell length of lemma. (B) Cell length of filament. (C) Cell area of anther. A two-tailed *t*-test was used to determine the significance of means. \*\* indicate  $P < 0.01$ .

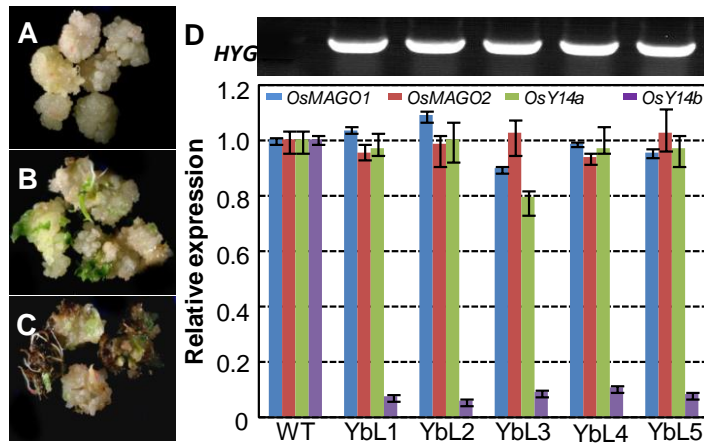

**Figure S5.** *Ubi:OsY14b*-RNAi Transgenic Rice Plants.

(A-C) Callus on MS medium with hygromycin for 2, 6 weeks and 2 months. (D) Gene expression of *OsMAGO1*, *OsMAGO2*, *OSY14a* and *OsY14b* in different *Ubi:OsY14b*-RNAi callus (green points, randomly picked as YbL1-YbL5). Expression of the gene resistance to hygromycin (*HYG*) was checked by RT-PCR. *OsACTIN1* was used as an internal control. Three-time PCR based on one biological sample were performed. The expression for each gene in wild-type was set to 1. The average expression and the standard deviation are presented. The results indicate a lethal effect of downregulating *OsY14b*.

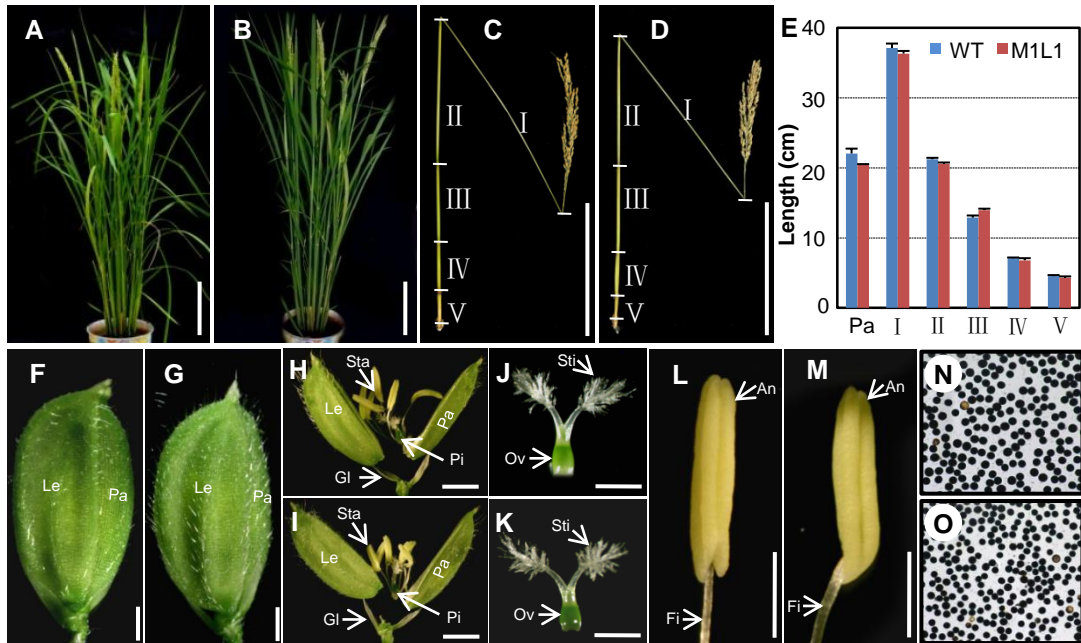

**Figure S6.** Phenotype of *OsMAGO1-3'UTR*-RNAi Transgenic Rice Plants.

(A and B) Rice plant at heading stage of wild-type (WT) and *OsMAGO1-3'UTR* RNAi line 1 (M1L1). Bars = 20 cm. (C and D) Internodes and panicle of wild-type (WT) and M1L1 after seed maturation. Bars = 20 cm. (E) Size quantification of the internode (I to V, where I is the uppermost) and panicle (Pa) between WT and M1L1. (F and G) Floret of WT and M1L1. Bars = 1 mm. (H and I) Artificial opened floret of WT and M1L1. Bars = 1 mm. (J and K) Pistil of WT and M1L1. Bars = 1 mm. (L and M) Stamen of WT and M1L1. Bars = 1 mm. Glumes (Gl), lemma (Le), palea (Pa), stamen (Sta), anther (An), filament (Fi), pistil (Pi), stigma (Sti) and ovary (Ov) are indicated in F-M. (N and O) The  $I_2$ -KI staining pollen grains of the WT and M1L1.

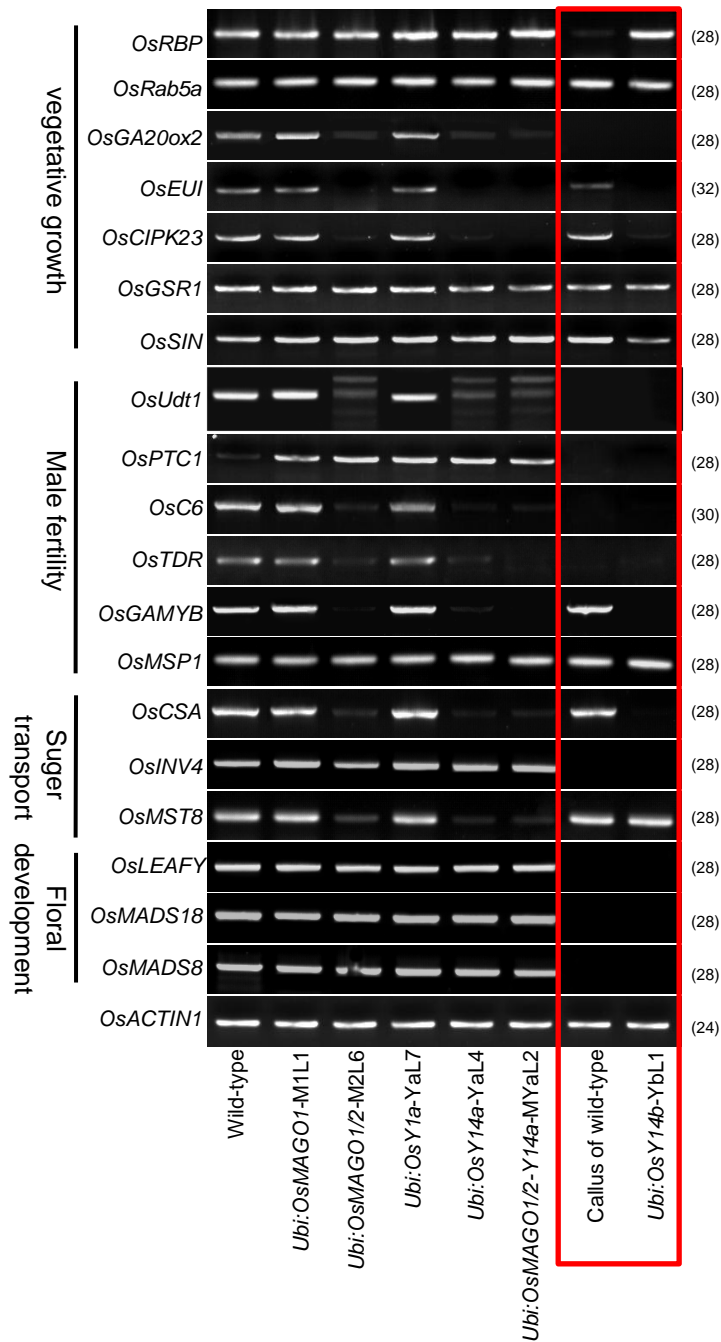

**Figure S7.** Gene Expression Profiles in the Transgenic Rice Plants.

Expression of 20 genes as indicated was revealed using RT-PCR in different genotypes indicated. The primers for each gene basically flank the whole coding region. The amplification cycle for each gene was given in the parenthesis. In *Ubi:OsY14b* line, callus was used to isolate the total RNA and wild-type callus was used as a control for all gene expression. In other backgrounds, the panicles were sampled for expression analyses with an exception of *OsGA20ox2* and *OsGSR1* sampled from flag leaves of these lines. The gene expression in callus of wild-type and *Ubi:OsY14b* are boxed in red. The information of these genes is presented in Table S4.

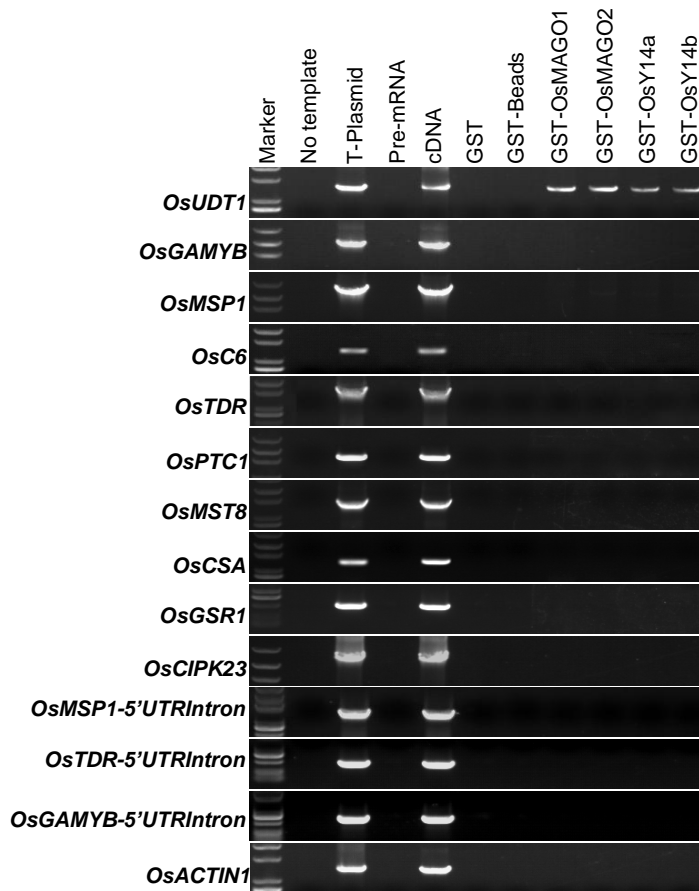

**Figure S8.** Rice MAGO and Y14 Specifically Bind to the *OsUDT1* Pre-mRNA. Saturated RT-PCR of different cDNAs indicated from the GST-MAGO and GST-Y14 beads. The “No template” and “pre-mRNA” were as negative controls, and plasmids and the corresponding cDNAs were used as positive controls. 1  $\mu$ g GST, Glutathione beads (GST-Beads), GST-MAGO and GST-Y14, were separately incubated with 250 ng different pre-mRNAs indicated.



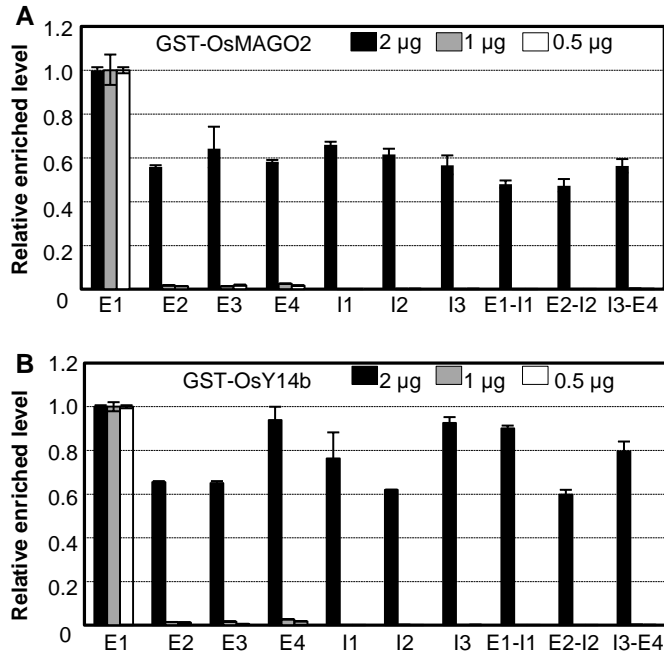

**Figure S9.** OsMAGO2 and OsY14b Proteins Bind to the *OsUDT1* Pre-mRNA. (A and B) Pre-mRNA competitive binding assays. The mixture of each exon (E) and intron (I) pre-mRNA fragment (125ng each) was incubated with the indicated concentrations of GST-OsMAGO2 (A) or GST-Y14b (B). Relative enriched level of the bound pre-mRNA was shown by qRT-PCR assays. The bound E1 pre-mRNA level was set to 1. Each experiment was performed with three independent samples, and error bars represent standard deviations.

**Table S1.** Transformation of Rice RNAi Lines.

| <b>RNAi construct</b>         | <b>Callus number</b> | <b>Resistant callus (HYG<sup>+</sup>)</b> | <b>Transformation efficiency (%)</b> | <b>Resistant seedlings</b> |
|-------------------------------|----------------------|-------------------------------------------|--------------------------------------|----------------------------|
| <i>Ubi:OsY14a</i>             | 95                   | 8                                         | 8.42                                 | 48                         |
| <i>Ubi:OsY14b</i>             | 405                  | 33                                        | 8.15                                 | 0                          |
| <i>Ubi:OsMAGO1-3'UTR</i>      | 167                  | 15                                        | 8.98                                 | 45                         |
| <i>Ubi:OsMAGO1-CDS</i>        | 310                  | 19                                        | 6.13                                 | 57                         |
| <i>Ubi:OsMAGO2-CDS</i>        | 285                  | 18                                        | 6.32                                 | 72                         |
| <i>Ubi:OsMAGO1-CDS-OsY14a</i> | 102                  | 9                                         | 8.82                                 | 36                         |

**Table S2.** Phenotypic Variations in RNAi Transgenic Rice Plants.

| Gene for silencing                                | Lines                                                                                                                   | Plant height (cm)                  | Floret length (mm)                | Anther length ( $\mu\text{m}$ )        | Filament length ( $\mu\text{m}$ )      | Pollen maturation (%) | Seed setting rate (%)              |
|---------------------------------------------------|-------------------------------------------------------------------------------------------------------------------------|------------------------------------|-----------------------------------|----------------------------------------|----------------------------------------|-----------------------|------------------------------------|
|                                                   | WT                                                                                                                      | 104.97 $\pm$ 2.31                  | 6.99 $\pm$ 0.17                   | 2780.39 $\pm$ 111.81                   | 2330.99 $\pm$ 133.32                   | 95.89                 | 93.27 $\pm$ 0.5                    |
| <i>OsY14a</i>                                     | <b>YaL1</b>                                                                                                             | <b>62.13<math>\pm</math>2.25**</b> | <b>7.50<math>\pm</math>0.25**</b> | <b>2268.13<math>\pm</math>143.41**</b> | <b>1947.10<math>\pm</math>120.90**</b> | <b>21.64**</b>        | <b>15.43<math>\pm</math>0.43**</b> |
|                                                   | <b>YaL2</b>                                                                                                             | <b>62.13<math>\pm</math>3.12**</b> | <b>7.45<math>\pm</math>0.19**</b> | <b>2213.83<math>\pm</math>145.24**</b> | <b>1954.83<math>\pm</math>135.42**</b> | <b>22.37**</b>        | <b>17.63<math>\pm</math>0.42**</b> |
|                                                   | <b>YaL3</b>                                                                                                             | <b>63.25<math>\pm</math>3.12**</b> | <b>7.47<math>\pm</math>0.16**</b> | <b>2238.25<math>\pm</math>120.28**</b> | <b>1978.34<math>\pm</math>123.35**</b> | <b>24.85**</b>        | <b>15.34<math>\pm</math>0.61**</b> |
|                                                   | <b>YaL4</b>                                                                                                             | <b>62.55<math>\pm</math>2.22**</b> | <b>7.52<math>\pm</math>0.23**</b> | <b>2179.16<math>\pm</math>113.51**</b> | <b>1953.19<math>\pm</math>125.92**</b> | <b>25.62**</b>        | <b>10.35<math>\pm</math>0.42**</b> |
|                                                   | <b>YaL5</b>                                                                                                             | <b>62.39<math>\pm</math>2.21**</b> | <b>7.39<math>\pm</math>0.19**</b> | <b>2272.59<math>\pm</math>156.28**</b> | <b>1898.85<math>\pm</math>135.12**</b> | <b>24.75**</b>        | <b>10.21<math>\pm</math>0.36**</b> |
|                                                   | <b>YaL6</b>                                                                                                             | <b>64.67<math>\pm</math>3.21**</b> | <b>7.43<math>\pm</math>0.13**</b> | <b>2225.37<math>\pm</math>125.13**</b> | <b>1918.12<math>\pm</math>123.38**</b> | <b>21.59**</b>        | <b>14.12<math>\pm</math>0.33**</b> |
|                                                   | YaL7                                                                                                                    | 103.54 $\pm$ 2.30                  | 6.98 $\pm$ 0.12                   | 2785.12 $\pm$ 121.51                   | 2332.21 $\pm$ 103.23                   | 95.49                 | 92.15 $\pm$ 0.19                   |
| <b><i>OsY14b</i></b>                              | <b>Transgenic plants were not generated indicating that the importance of <i>OsY14b</i> in embryonic organogenesis.</b> |                                    |                                   |                                        |                                        |                       |                                    |
| <i>OsMAGO1</i> 3'UTR                              | M1L1                                                                                                                    | 102.5 $\pm$ 2.46                   | 6.98 $\pm$ 0.14                   | 2735.62 $\pm$ 125.36                   | 2369.38 $\pm$ 162.62                   | 96.12                 | 94.33 $\pm$ 0.25                   |
|                                                   | M1L2                                                                                                                    | 103.13 $\pm$ 2.59                  | 6.88 $\pm$ 0.15                   | 2719.54 $\pm$ 131.32                   | 2354.32 $\pm$ 156.32                   | 95.23                 | 95.14 $\pm$ 0.21                   |
|                                                   | M1L3                                                                                                                    | 102.25 $\pm$ 2.36                  | 6.95 $\pm$ 0.13                   | 2752.32 $\pm$ 151.25                   | 2338.26 $\pm$ 167.23                   | 96.25                 | 92.65 $\pm$ 0.34                   |
|                                                   | M1L4                                                                                                                    | 103.55 $\pm$ 2.28                  | 7.03 $\pm$ 0.15                   | 2746.98 $\pm$ 136.24                   | 2312.36 $\pm$ 151.21                   | 96.54                 | 93.78 $\pm$ 0.46                   |
|                                                   | M1L5                                                                                                                    | 101.40 $\pm$ 2.54                  | 7.11 $\pm$ 0.16                   | 2769.12 $\pm$ 127.63                   | 2321.65 $\pm$ 165.84                   | 95.21                 | 91.12 $\pm$ 0.18                   |
|                                                   | M1L6                                                                                                                    | 104.67 $\pm$ 2.42                  | 6.98 $\pm$ 0.16                   | 2783.25 $\pm$ 121.21                   | 2331.09 $\pm$ 113.22                   | 95.43                 | 94.63 $\pm$ 0.37                   |
| <i>OsMAGO1</i> CDS                                | <b>M1L7</b>                                                                                                             | <b>67.97<math>\pm</math>2.21**</b> | <b>7.42<math>\pm</math>0.17**</b> | <b>2474.84<math>\pm</math>121.83**</b> | <b>1970.80<math>\pm</math>127.45**</b> | <b>20.83**</b>        | <b>12.54<math>\pm</math>0.32**</b> |
|                                                   | <b>M1L8</b>                                                                                                             | <b>68.33<math>\pm</math>3.15**</b> | <b>7.35<math>\pm</math>0.43*</b>  | <b>2413.83<math>\pm</math>118.84**</b> | <b>2003.93<math>\pm</math>117.45**</b> | <b>32.61**</b>        | <b>17.96<math>\pm</math>0.25**</b> |
|                                                   | <b>M1L9</b>                                                                                                             | <b>68.17<math>\pm</math>3.18**</b> | <b>7.39<math>\pm</math>0.15**</b> | <b>2435.27<math>\pm</math>108.32**</b> | <b>1985.64<math>\pm</math>105.37**</b> | <b>22.45**</b>        | <b>13.36<math>\pm</math>0.46**</b> |
|                                                   | M1L10                                                                                                                   | 104.88 $\pm$ 3.21                  | 7.00 $\pm$ 0.13                   | 2753.31 $\pm$ 100.11                   | 2325.94 $\pm$ 126.12                   | 93.24                 | 93.45 $\pm$ 0.62                   |
|                                                   | M1L11                                                                                                                   | 105.02 $\pm$ 3.25                  | 7.01 $\pm$ 0.15                   | 2782.63 $\pm$ 103.23                   | 2333.14 $\pm$ 106.31                   | 96.02                 | 92.55 $\pm$ 0.49                   |
| <i>OsMAGO2</i> CDS                                | M2L1                                                                                                                    | na                                 | na                                | na                                     | na                                     | 93.12                 | 92.35 $\pm$ 0.36                   |
|                                                   | M2L2                                                                                                                    | na                                 | na                                | na                                     | na                                     | 92.35                 | 93.66 $\pm$ 0.43                   |
|                                                   | M2L3                                                                                                                    | na                                 | na                                | na                                     | na                                     | 94.53                 | 91.86 $\pm$ 0.56                   |
|                                                   | <b>M2L4</b>                                                                                                             | <b>63.61<math>\pm</math>2.55**</b> | <b>7.59<math>\pm</math>0.26**</b> | <b>2206.15<math>\pm</math>120.96**</b> | <b>1932.96<math>\pm</math>188.27**</b> | <b>12.88**</b>        | <b>11.55<math>\pm</math>0.21**</b> |
|                                                   | <b>M2L5</b>                                                                                                             | <b>64.52<math>\pm</math>2.36**</b> | <b>7.69<math>\pm</math>0.29**</b> | <b>2212.34<math>\pm</math>120.98**</b> | <b>1858.01<math>\pm</math>281.05**</b> | <b>13.56**</b>        | <b>11.95<math>\pm</math>0.25**</b> |
|                                                   | <b>M2L6</b>                                                                                                             | <b>62.45<math>\pm</math>2.70**</b> | <b>7.73<math>\pm</math>0.25**</b> | <b>2195.63<math>\pm</math>110.22**</b> | <b>1862.25<math>\pm</math>256.62**</b> | <b>12.43**</b>        | <b>9.37<math>\pm</math>0.34**</b>  |
|                                                   | M2L7                                                                                                                    | 101.32 $\pm$ 2.37                  | 7.02 $\pm$ 0.18                   | 2769.95 $\pm$ 100.93                   | 2315.96 $\pm$ 113.25                   | 94.62                 | 94.33 $\pm$ 0.43                   |
|                                                   | M2L8                                                                                                                    | 102.65 $\pm$ 2.33                  | 6.95 $\pm$ 0.23                   | 2778.69 $\pm$ 102.65                   | 2328.12 $\pm$ 124.63                   | 94.73                 | 93.74 $\pm$ 0.32                   |
| <i>OsMAGO1</i><br><i>OsMAGO2</i><br><i>OsY14a</i> | <b>MYaL1</b>                                                                                                            | <b>52.93<math>\pm</math>2.88**</b> | <b>7.56<math>\pm</math>0.21**</b> | <b>1725.22<math>\pm</math>49.54**</b>  | <b>1852.22<math>\pm</math>77.38**</b>  | <b>10.32**</b>        | <b>9.22<math>\pm</math>0.32**</b>  |
|                                                   | <b>MYaL2</b>                                                                                                            | <b>55.13<math>\pm</math>2.63**</b> | <b>7.62<math>\pm</math>0.15**</b> | <b>1722.36<math>\pm</math>54.32**</b>  | <b>1836.33<math>\pm</math>69.86**</b>  | <b>5.49**</b>         | <b>8.35<math>\pm</math>0.21**</b>  |
|                                                   | <b>MYaL3</b>                                                                                                            | <b>57.25<math>\pm</math>2.32**</b> | <b>7.48<math>\pm</math>0.13**</b> | <b>1698.65<math>\pm</math>54.36**</b>  | <b>1795.22<math>\pm</math>83.59**</b>  | <b>7.86**</b>         | <b>10.23<math>\pm</math>0.64**</b> |
|                                                   | <b>MYaL4</b>                                                                                                            | <b>53.55<math>\pm</math>2.25**</b> | <b>7.61<math>\pm</math>0.12**</b> | <b>1702.33<math>\pm</math>49.59**</b>  | <b>1802.34<math>\pm</math>75.63**</b>  | <b>6.43**</b>         | <b>10.59<math>\pm</math>0.33**</b> |
|                                                   | <b>MYaL5</b>                                                                                                            | <b>54.39<math>\pm</math>2.35**</b> | <b>7.39<math>\pm</math>0.11**</b> | <b>1695.21<math>\pm</math>51.20**</b>  | <b>898.85<math>\pm</math>66.652**</b>  | <b>15.92**</b>        | <b>11.33<math>\pm</math>0.25**</b> |
|                                                   | <b>MYaL6</b>                                                                                                            | <b>64.65<math>\pm</math>2.42**</b> | <b>7.45<math>\pm</math>0.16**</b> | <b>1688.87<math>\pm</math>59.63**</b>  | <b>1798.12<math>\pm</math>59.87**</b>  | <b>12.59**</b>        | <b>12.72<math>\pm</math>0.54**</b> |
|                                                   | MYaL7                                                                                                                   | 101.54 $\pm$ 2.52                  | 7.12 $\pm$ 0.09                   | 2654.28 $\pm$ 69.61                    | 2302.15 $\pm$ 59.64                    | 90.03                 | 91.99 $\pm$ 0.38                   |

Transgenic plants with obvious phenotype are showed by overstriking letters and numbers, while the WT and WT-like transgenic plants are in normal. CDS, coding regions. 3'UTR, 3' untranslated regions. WT, wild-type. na, not analyzed. *T*-tests, \* *P* < 0.05, \*\* *P* < 0.01.

**Table S3.** Ovary Fertility Comparison between the Wild-Type and Transgenic Rice Plants.

|                     | WT    | <i>Ubi:OsY1</i><br>4a-YaL4 | <i>Ubi:OsMAGO</i><br>1-CDS-M1L7 | <i>Ubi:OsMAGO</i><br>2-CDS-M2L6 | <i>Ubi:OsMAGO1-</i><br><i>CDS-OsY14a-</i><br>MYaL2 | <i>Ubi:OsMAGO1-</i><br>3'UTR-M1L1 |
|---------------------|-------|----------------------------|---------------------------------|---------------------------------|----------------------------------------------------|-----------------------------------|
| Ovary fertility (%) | 68.63 | 65.37                      | 67.21                           | 64.39                           | 61.38                                              | 69.33                             |
| Number              | N=118 | N=109                      | N=112                           | N=125                           | N=115                                              | N=117                             |

**Table S4.** Gene Information Used in Expression Studies.

| Gene name        | Accession No. Of CDS (Phytozome) | Sequence length (bp) | Exon number | Intron number | Largest intron length (bp) |     | Near centrosome area |
|------------------|----------------------------------|----------------------|-------------|---------------|----------------------------|-----|----------------------|
| <i>OsRBP</i>     | LOC_Os12g01916.1                 | 3986                 | 4           | 3             | 2163                       | (2) | no                   |
| <i>OsRBA5A</i>   | LOC_Os12g43550.1                 | 2922                 | 6           | 5             | 859                        | (3) | no                   |
| <i>OsGA20OX2</i> | LOC_Os01g66100.1                 | 2827                 | 3           | 2             | 1471                       | (2) | no                   |
| <i>OsEUI</i>     | LOC_Os05g40384.1                 | 9784                 | 2           | 1             | 7874                       | (1) | no                   |
| <i>OsCIPK23</i>  | LOC_Os07g05620.1                 | 4075                 | 14          | 13            | 595                        | (2) | no                   |
| <i>OsGSR1</i>    | LOC_Os06g15620.1                 | 475                  | 2           | 1             | 104                        | (1) | no                   |
| <i>OsSIN</i>     | LOC_Os03g22510.1                 | 330                  | 1           | 0             | 0                          |     | no                   |
| <i>OsUDT1</i>    | LOC_Os07g36460.1                 | 1830                 | 4           | 3             | 521                        | (2) | no                   |
| <i>OsPTC1</i>    | LOC_Os09g27620.1                 | 2215                 | 3           | 2             | 101                        | (2) | no                   |
| <i>OsC6</i>      | LOC_Os11g37280.1                 | 1067                 | 2           | 1             | 591                        | (1) | no                   |
| <i>OsTDR</i>     | LOC_Os02g02820.1                 | 2987                 | 8           | 7             | 337                        | (1) | no                   |
| <i>OsGAMYB</i>   | LOC_Os01g59660.1                 | 3946                 | 4           | 3             | 1257                       | (2) | no                   |
| <i>OsMSP1</i>    | LOC_Os01g68870.2                 | 6977                 | 4           | 3             | 2091                       | (2) | no                   |
| <i>OsCSA</i>     | LOC_Os01g16810.1                 | 1217                 | 2           | 1             | 81                         | (1) | no                   |
| <i>OsINV4</i>    | LOC_Os04g33720.1                 | 2461                 | 6           | 5             | 223                        | (1) | no                   |
| <i>OsMST8</i>    | LOC_Os01g38670.1                 | 2084                 | 4           | 3             | 291                        | (2) | no                   |
| <i>OsLEAFY</i>   | LOC_Os04g51000.1                 | 3014                 | 3           | 2             | 1555                       | (2) | no                   |
| <i>OsMADS8</i>   | LOC_Os09g32948.1                 | 6032                 | 8           | 7             | 2606                       | (1) | no                   |
| <i>OsMADS18</i>  | LOC_Os07g41370.1                 | 4955                 | 8           | 7             | 2726                       | (1) | no                   |
| <i>OsACTIN</i>   | LOC_Os03g50885.1                 | 1558                 | 4           | 3             | 249                        | (2) | no                   |

Sequence length ranges from the putative transcription initiation site to the stop codon. The "no" indicates the gene is not near the centrosome. The location of the largest intron in each gene is given in parenthesis.

**Table S5.** List of Primers Used in the Present Study.

| Usage                                     | Gene name                   | Forward sequences (5'-3')            | Reverse sequences (5'-3')             |
|-------------------------------------------|-----------------------------|--------------------------------------|---------------------------------------|
| RNA-binding                               | <i>OsUDT1</i>               | GAGTTTGAGACTTGAGGCTGC                | AGTGTCTCAGATGCTTGGAAAC                |
|                                           | <i>OsGAMYB</i>              | ATGTATCGGGTGAAGAGCGAGAG              | TTTGAATTCTGACATTTACAGGC               |
|                                           | <i>OsGAMYB-5UTRIntron</i>   | TGTTCTTGCAGAAATTCGGC                 | CTACACCGGAAAATTTGGAAG                 |
|                                           | <i>OsMSP1</i>               | TCCAATAGTTTCTGGCTTTTCATCCTG          | CATGTCCCTGGAGACGGTCACCACCAG           |
|                                           | <i>OsMSP1-5UTRIntron</i>    | GGTGAAGCGAGGTTCTGGAC                 | TTGAACATGTAATGGCCGAAC                 |
|                                           | <i>OsC6</i>                 | AGCTAGCTCAAGCTCTAATCCAC              | CATATATACTCAGGCAGATGGAGC              |
|                                           | <i>OsTDR</i>                | TGATCACCACATGGGAAGAGGAG              | CAATCAAACGCGAGGTAATGCAGG              |
|                                           | <i>OsTDR-5UTRIntron</i>     | GAAGGTATCTTTCTTTCTCTGC               | CTAGCAGTGACACATGAAAGC                 |
|                                           | <i>OsPTC1</i>               | ATGGCGCTAAGATGGTGATCAG               | TGCAGCAGCTCAGTCCATG                   |
|                                           | <i>OsMST8</i>               | ATGGCCGGCGGCCCATGACCGAC              | GCAATGGATCGATGTAGCCAGCAG              |
|                                           | <i>OsCSA</i>                | ATGGCTCACGAGATGATGGGTG               | CGTCGCCGTAATCATGTCCG                  |
|                                           | <i>OsGSR1</i>               | TAAGTCCCTAACCCACCCAAAC               | AAGGCATGCATCTTAGGGGC                  |
|                                           | <i>OsCIPK23</i>             | GATCTGAGAGGGACAGGGGAAG               | GTTTTCTGGCTGGTTATCTAC                 |
|                                           | <i>OsUDT1-Exon1</i>         | AGTTTGAGACTTGAGGCTGC                 | CTTGGTGATCTTGGGACGAC                  |
|                                           | <i>OsUDT1-Exon2</i>         | ATGAGCAAGGAGGCCACCTTG                | CTGATAATGGGCGTTCTCAG                  |
|                                           | <i>OsUDT1-Exon3</i>         | GGTCAGGTGGAATTGATCTC                 | CTCGATGGTGAAGAACTCTC                  |
|                                           | <i>OsUDT1-Exon4</i>         | GTGAAGGGTGAGCAGGATGTTG               | AGTGCTCAGATGCTTGGAAAC                 |
|                                           | <i>OsUDT1-Exon1-Intron1</i> | AAGAACCTGGAGCGGACGCG                 | TTCCAGAAATCGAGAGAGGG                  |
|                                           | <i>OsUDT1-Exon2-Intron2</i> | CTTGGAGAGAAGCAAGGCAGCG               | TGTTCAGAATTAGTCCAGGG                  |
|                                           | <i>OsUDT1Intron3-Exon4</i>  | ATTGCATGTAGATTTCCGCTG                | AGTGTCTCAGATGCTTGGAAAC                |
| RT-PCR for gene expression                | <i>OsRBP</i>                | GAGGTGGGAATGGACATGCCGC               | CTACTCCTTACGACCCTAGCG                 |
|                                           | <i>OsRAB5A</i>              | ATCCCTCATCCGATCTGAATC                | GTTGTACATACTCCACACTTG                 |
|                                           | <i>OsGA20OX2</i>            | ATGGACTCCACCGCCGCTCTG                | CCAGGTGAAGTCCGGGTAGTGCTG              |
|                                           | <i>OsEUI</i>                | GAAAGAGAGAGTAGGCTGCC                 | TGTAGAACTCCGGCGCATGAC                 |
|                                           | <i>OsCIPK23</i>             | GATCTGAGAGGGACAGGGGAAG               | GTTTTCTGGCTGGTTATCTAC                 |
|                                           | <i>OsGSR1</i>               | TAAGTCCCTAACCCACCCAAAC               | AAGGCATGCATCTTAGGGGC                  |
|                                           | <i>OsSIN</i>                | GTGAGTTGGATGGCGGGGAC                 | GCTAGTCTTATCAAGACC                    |
|                                           | <i>OsUDT1</i>               | GAGTTTGAGACTTGAGGCTGC                | AGTGTCTCAGATGCTTGGAAAC                |
|                                           | <i>OsPTC1</i>               | ATGGCGCTAAGATGGTGATCAG               | CTCCTGGCTGAAGCAGCAGACAG               |
|                                           | <i>OsC6</i>                 | AGCTAGCTCAAGCTCTAATCCAC              | CATATATACTCAGGCAGATGGAGC              |
|                                           | <i>OsTDR</i>                | ATGGGAAGAGGAGACCACCTG                | ACTTGTCTGGTAGTGCTCTCC                 |
|                                           | <i>OsGAMYB</i>              | ATGTATCGGGTGAAGAGCGAGAG              | TTTGAATTCTGACATTTACAGGC               |
|                                           | <i>OsMSP1</i>               | TCCAATAGTTTCTGGCTTTTCATCCTG          | CATGTCCCTGGAGACGGTCACCACCAG           |
|                                           | <i>OsINV4</i>               | ATGGCGACGGCGAGGGCGAGGGCC             | CTACTCCTCCGCTTCATCTTCGG               |
|                                           | <i>OsCSA</i>                | ATGGCTCACGAGATGATGGGTG               | CGTCGCCGTAATCATGTCCG                  |
|                                           | <i>OsMST8</i>               | ATGGCCGGCGGCCCATGACCGAC              | TCATACTGTGAGGTAATCTCGAC               |
|                                           | <i>OsLEAFY</i>              | ATGGATCCCAACGATGCCCTTCTCG            | TCTCCGGCGAGCTTAGAACAGGG               |
|                                           | <i>OsMADS8</i>              | ACTCCTCGCACACTTCGGAATTCC             | ATGTAGCCAGCAGATTCAATTACG              |
|                                           | <i>OsMADS18</i>             | ATGGGGAGAGGGCCGGTGACAG               | TCATGTGTGACTTGTCCGGAG                 |
|                                           | <i>OsACTIN1</i>             | ATGGCTGACGCCGAGGATATCC               | GAAGCATTCTGTGCACAATGG                 |
| RT-PCR                                    | <i>Hygromycin</i>           | GTCGTCCATCACAGTTTGCC                 | TGACATTGGGGAGTTTAGCG                  |
| qRT-PCR for identification of transgenics | <i>OsMAGO1</i>              | GAGGATGACAGCAACTGGCCG                | CGTCCCCATCACGATCTCC                   |
|                                           | <i>OsMAGO2</i>              | CCGGAGGATCATCCAGGAGTC                | CACGAAACATTTACAGATCCTG                |
|                                           | <i>OsY14a</i>               | GAAGGATGGATTGTGCTAGTC                | GCATTCTAAAGCACCATCATAC                |
|                                           | <i>OsY14b</i>               | GGCGATCTCGGACTCCACTC                 | CTCAGTCACTACAACAGCCTC                 |
|                                           | <i>OsACTIN1</i>             | AGGCTCCTCTCAACCCCAAGGC               | GACACCATCACAGAGTCCAACAC               |
| RNAi                                      | <i>OsMAGO1-3UTR</i>         | TAGGTACCACTAGTGCTCCTTTCAGTTTCTTAATTG | AGGGATCCGAGCTCCTGCCAAAAGGATGTAAAGAAGC |
|                                           | <i>OsMAGO1-CDS</i>          | TAGGTACCACTAGTGAGTTCTACCTGCGGTACTAC  | ATGGATCCGAGCTCTTGAAGTGGAGATTGATGAG    |
|                                           | <i>OsMAGO2-CDS</i>          | TAGGTACCACTAGTATGGCGACGGGCGGCC       | ATGGATCCGAGCTCGTTGCCATAACAATCTCG      |
|                                           | <i>OsY14a</i>               | TAGGTACCACTAGTTGAAGGATGGATTGTGCTAG   | ATGGATCCGAGCTCAGTATCTTCTCCTCGGTG      |
|                                           | <i>OsY14b</i>               | TAGGTACCACTAGTGATATGCATTAGTTGAATATG  | AGGGATCCGAGCTCGGAAGATATATCACACCATAC   |
| Subcellular Localization                  | <i>OsMAGO1</i>              | ATCCATGGCGACGGTGGCCGGC               | ATACTAGTAGATTGAATAGGCTTGATCTTG        |
|                                           | <i>OsMAGO2</i>              | ATTCTAGATGGCGACGGGCGGCCGCGC          | ATGGTACCAGATTGAATAGGCTTGATCTTG        |
|                                           | <i>OsY14a</i>               | ATCCATGGCTGCGGTGACCAACG              | GCACATGTATCTTCTCCTCGGTGGGGATC         |
|                                           | <i>OsY14b</i>               | AACCATGGCGCGGCGGGCGGAGGACG           | ATACTAGTACATGTCAAGGCAGCAAGCCTG        |
| BiFC                                      | <i>OsMAGO1</i>              | ATTCTAGAATGGCGACGGTGGCCGGCGAC        | ATACTAGTAGATTGAATAGGCTTGATCTTG        |
|                                           | <i>OsMAGO2</i>              | ATTCTAGAATGGCGACGGGCGGCCGCGC         | ATACTAGTAGATTGAATAGGCTTGATCTTG        |
|                                           | <i>OsY14a</i>               | ATTCTAGAATGGCTGCGGTGACCAACG          | GCACATGTATCTTCTCCTCGGTGGGGATC         |
|                                           | <i>OsY14b</i>               | ATTCTAGAATGGCGCGGCGGGCGGAGGACG       | ATACTAGTACATGTCAAGGCAGCAAGCCTG        |
